# Supplementary material
Source: PubMed Central journal article supplement (PMC4862731)
Supplement: IAI.00007-16_zii999091688so1.pdf [file IAI.00007-16_zii999091688so1.pdf]

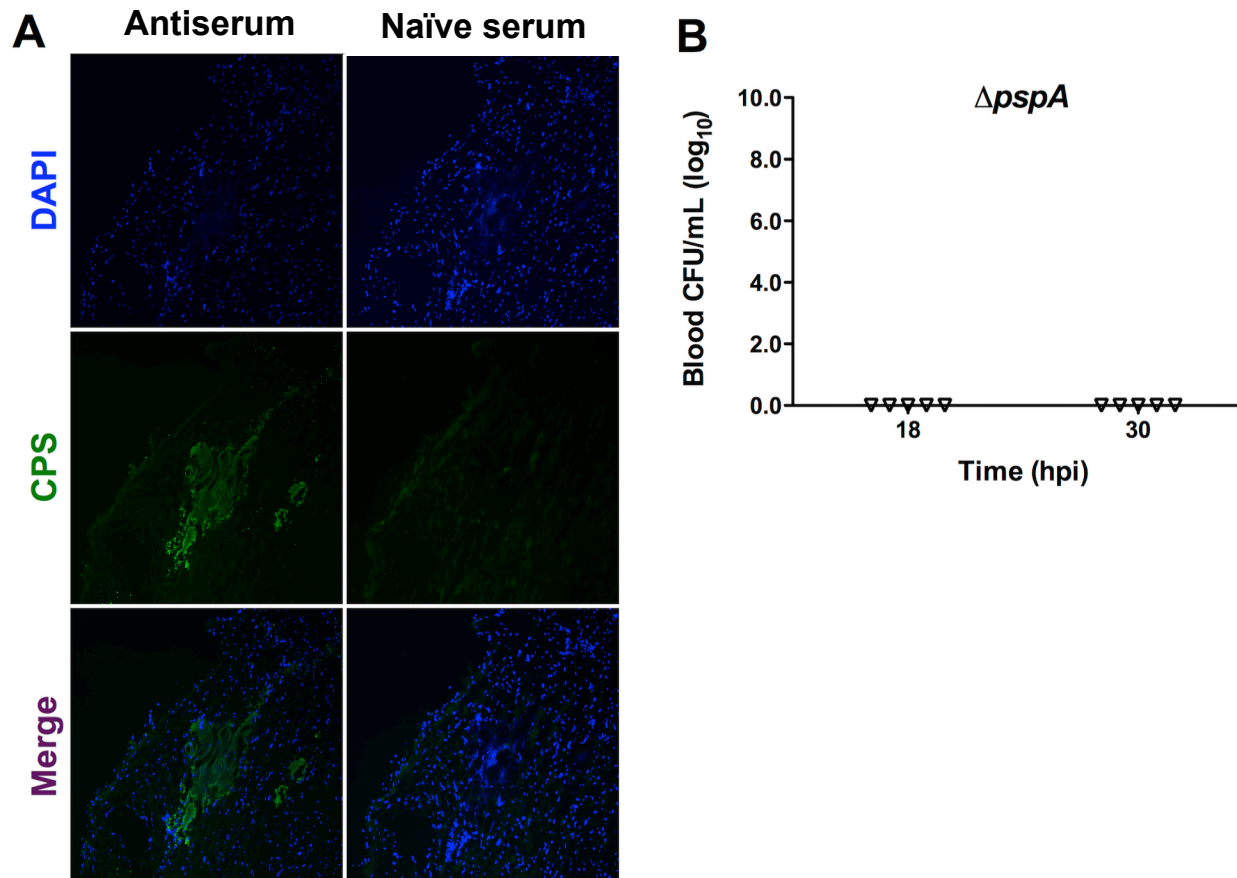

**Supplemental Figure 1. Control for specificity of polyclonal antibody used against CPS.** Infected mouse heart sections were stained for serotype 4 capsular polysaccharide using polyclonal rabbit antiserum and naïve rabbit serum with goat anti-rabbit FITC as secondary antibody. **B) PspA is required for TIGR4 bacteremia.** Blood titers from mice infected with T4  $\Delta pspA$  at time of euthanasia.
