# Supplementary material
Source: PubMed Central journal article supplement (PMC4862731)
Supplement: IAI.00007-16_zii999091688so2.pdf [file IAI.00007-16_zii999091688so2.pdf]

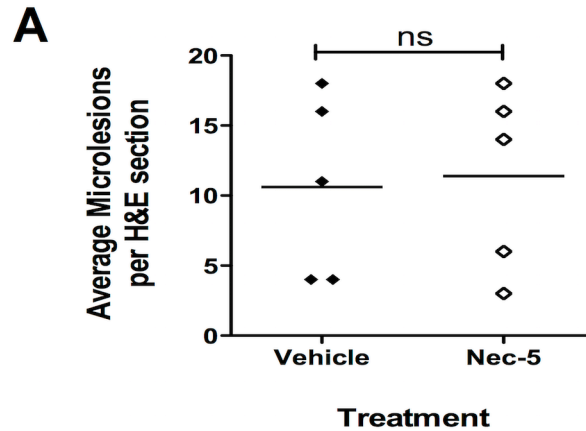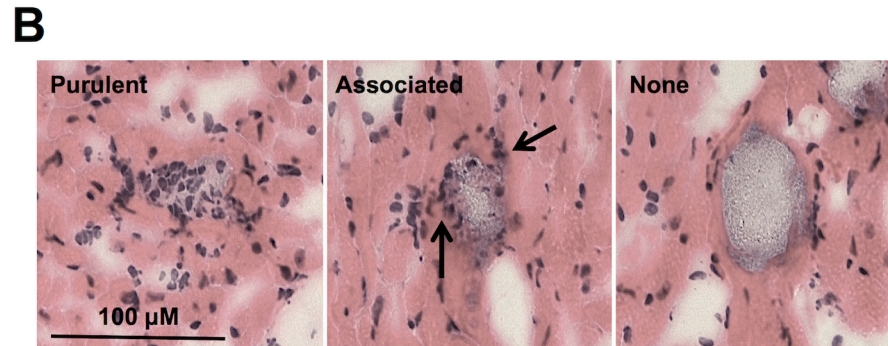

**Supplemental Figure 2. A) Enumeration of cardiac microlesions in necrostatin-5 treated mice versus controls.** Average number of microlesions per section in mice infected with TIGR4 and treated with either vehicle (DMSO) or necrostatin-5 at 24 hpi, counts are averages of three non-adjacent sections per animal. **B) Images of cardiac microlesions in necrostatin-treated mice.** Representative images of H&E stained frozen sections from TIGR4 challenged mice treated with necrostatin-5 showing microlesions that: are fully purulent (left), have immune cells associated with the periphery (center, arrows), or devoid of immune cells (right).
